# Supplementary material for: Gasdermins induce the release of mitochondrial DNA during pyroptosis and apoptosis
Source: Research Square preprint supplement (doi:10.21203/rs.3.rs-106456/v1), 2025-01-23

Supplementary Figure Legends for:

**Gasdermin induces the release of mitochondrial DNA during pyroptosis and apoptosis**

de Torre-Minguela et al.

**Supplementary Figure S1. GSDMD activation mediates macrophage pyroptosis and mitochondrial damage**

A,B Different genotypes of macrophages (as indicated) were primed for 4 h with LPS (10 ng/ml) and then stimulated during 20 min with ATP (3 mM) or nigericin (5  $\mu$ M), and IL-1 $\beta$  (A) or LDH (B) were detected in the cell-free supernatants.

C Immunoblot for TOMM20, GSDMD and  $\alpha$ -tubulin in cell lysates and mitochondria fraction obtained from wild type macrophages primed and activated as in A. Mitochondrial fraction was isolated with ultracentrifugation.

D Immunoblot for TOMM20, GSDMD and  $\alpha$ -tubulin in cell lysates and mitochondria fraction obtained from wild type macrophages primed as in A and then stimulated with nigericin (10  $\mu$ M). Mitochondrial fraction was isolated with an antibody-based kit.

E Different genotypes of macrophages (as indicated) were primed and activated as in A. Maximum intensity projections of z-stack images of macrophages stained with TOMM20 antibodies (green) and DAPI (blue) are shown. Scale bar represents 8  $\mu$ m.

Data information: Data from panel A and B are means  $\pm$  SEM from at least ten independent experiments. Statistical analyses were performed using non-parametric Mann–Whitney t-tests. Data were considered significant when \*\*\*P < 0.001. Immunoblots of panels C and D are from  $n=1$  independent experiment. Microscopy images of panel E are representative of three independent experiments.

28

29 **Supplementary Figure S2. MitoTEMPO partially blocks MitoSOX fluorescence**

30 A Kinetic of MitoSOX fluorescence of unprimed wild type macrophages stimulated with ATP (3  
31 mM), nigericin (5  $\mu$ M) or antimycin A (10  $\mu$ M).

32 B Kinetic of MitoSOX fluorescence of macrophages primed for 4 h with LPS (10 ng/ml) and then  
33 stimulated with nigericin (5  $\mu$ M) in presence or absence of MitoTEMPO (250 mM). Cells treated  
34 with inhibitors were incubated 10 min before and during stimulation of the cells.

35

36 Data information: Data are means  $\pm$  SEM from at least three independent experiments.

37

38 **Supplementary Figure S3. GSDMD<sup>NT</sup> and GSDME<sup>NT</sup> expression**

39 A Immunoblot for Flag (GSDMD and GSDMD<sup>NT</sup>) and  $\beta$ -Actin in cell lysates of HEK293T  
40 transfected for 12 h with a plasmid encoding human GSDMD or human GSDMD<sup>NT</sup> (1-275).

41 B YoPro-1 uptake of wild type macrophages primed for 4 h with LPS (10 ng/ml) and stimulated  
42 with nigericin (10  $\mu$ M), or *Casp1/11*<sup>-/-</sup> macrophages treated with DMSO or staurosporin (1  $\mu$ M).  
43 Measurement of YoPro-1 fluorescence were performed at the indicated times.

44 C Immunoblot for GSDME and  $\beta$ -Actin in cell lysates of HEK293T transfected for 12 h with a  
45 plasmid encoding for human GSDME<sup>NT</sup> (1-270) or with a control empty vector (pcDNA).

46 Data information: Immunoblots of panels A and C are representative of three independent  
47 experiments. Data of panel B are means  $\pm$  SEM from three-four independent experiments in  
48 triplicates. Statistical analyses were performed using non-parametric Mann–Whitney t-tests. Data  
49 were considered significant when \*\*\*P < 0.001 or \*\*\*\*P < 0.0001

50

51 **Supplementary Figure S4. Digitonin induce plasma membrane permeabilization and**  
52 **mitochondrial network fragmentation**

53 A Kinetic of MitoSOX fluorescence and YoPro-1 uptake in wild type macrophages primed for 4 h  
54 with LPS (10 ng/ml) and then treated with digitonin (50  $\mu$ g/ml) when indicate by the arrow

B Maximum intensity projections of z-stack images of wild type macrophages treated as in A and stained with TOMM20 antibodies (green) and DAPI (blue). Scale bar represents 10  $\mu$ m.

Data information: Data in panel A are means  $\pm$  SEM from three independent experiments. Microscopy image of panel B is representative of three independent experiments.

**Supplementary Figure S5. Uncropped immunoblots of Figure 1A**

**Supplementary Figure S6. Uncropped immunoblots of Figure 1B**

**Supplementary Figure S7. Uncropped immunoblots of Figure 1B**

**Supplementary Figure S8. Uncropped immunoblots of Figure 3A**

**Supplementary Figure S9. Uncropped immunoblots of Figure 4A**

**Supplementary Figure S10. Uncropped immunoblots of Figure 5C**

**Supplementary Figure S11. Uncropped immunoblots of Figure 6A**

**Supplementary Figure S12. Uncropped immunoblots of Supplementary Figure S1C and S1D**

**Supplementary Figure S13. Uncropped immunoblots of Supplementary Figure S3A and S3B**

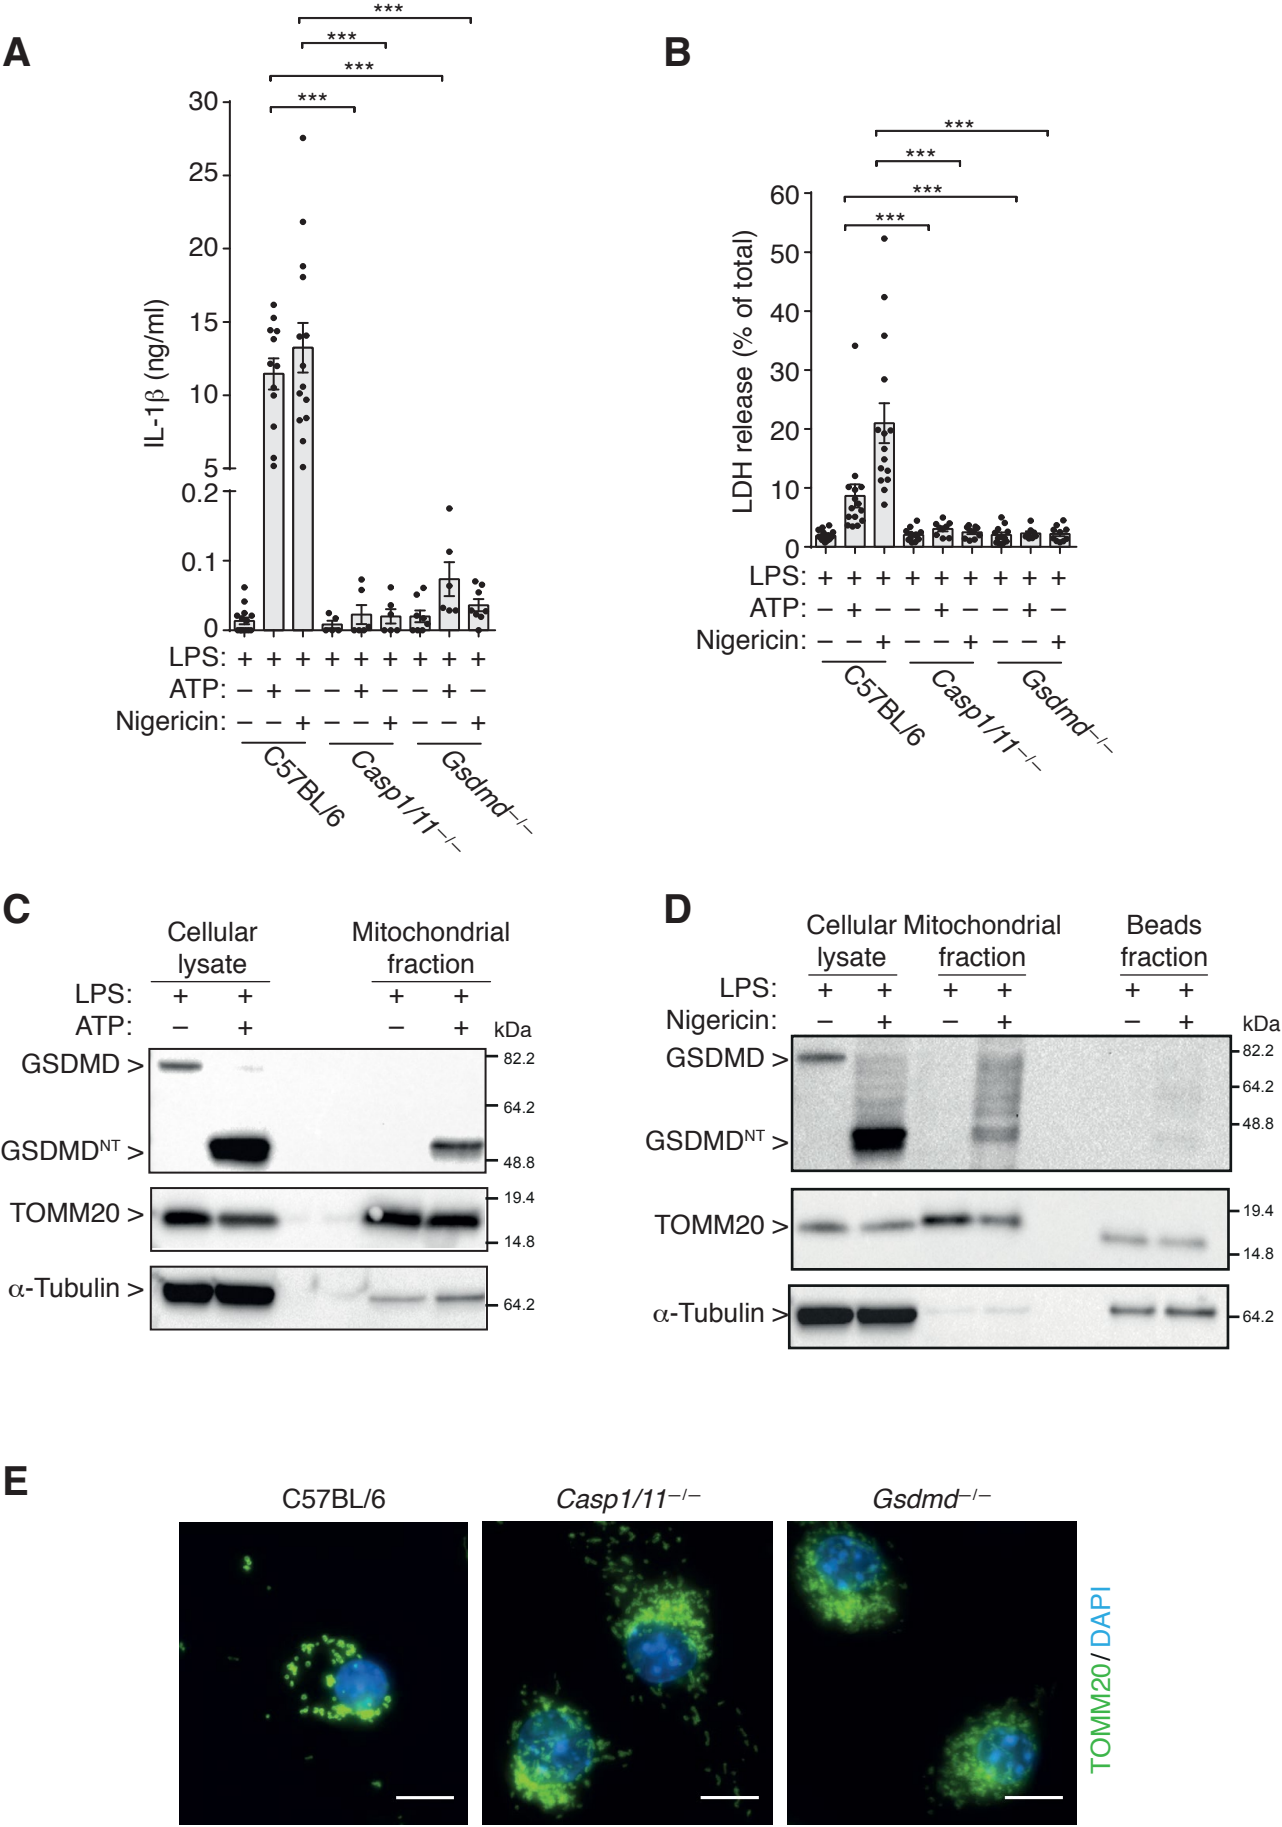

**A**

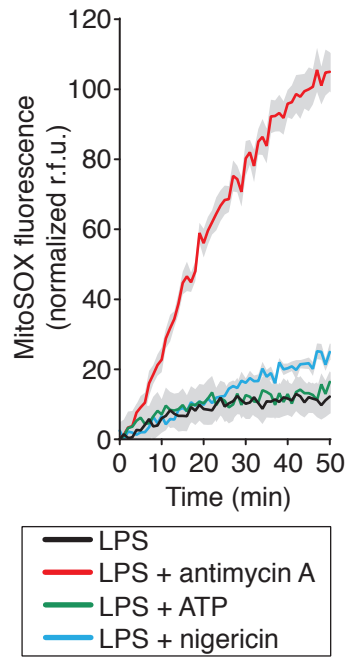

**B**

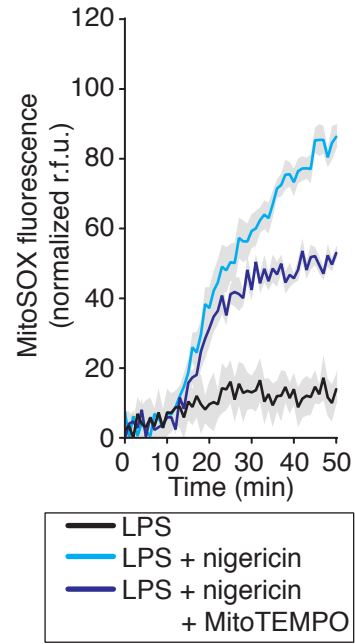

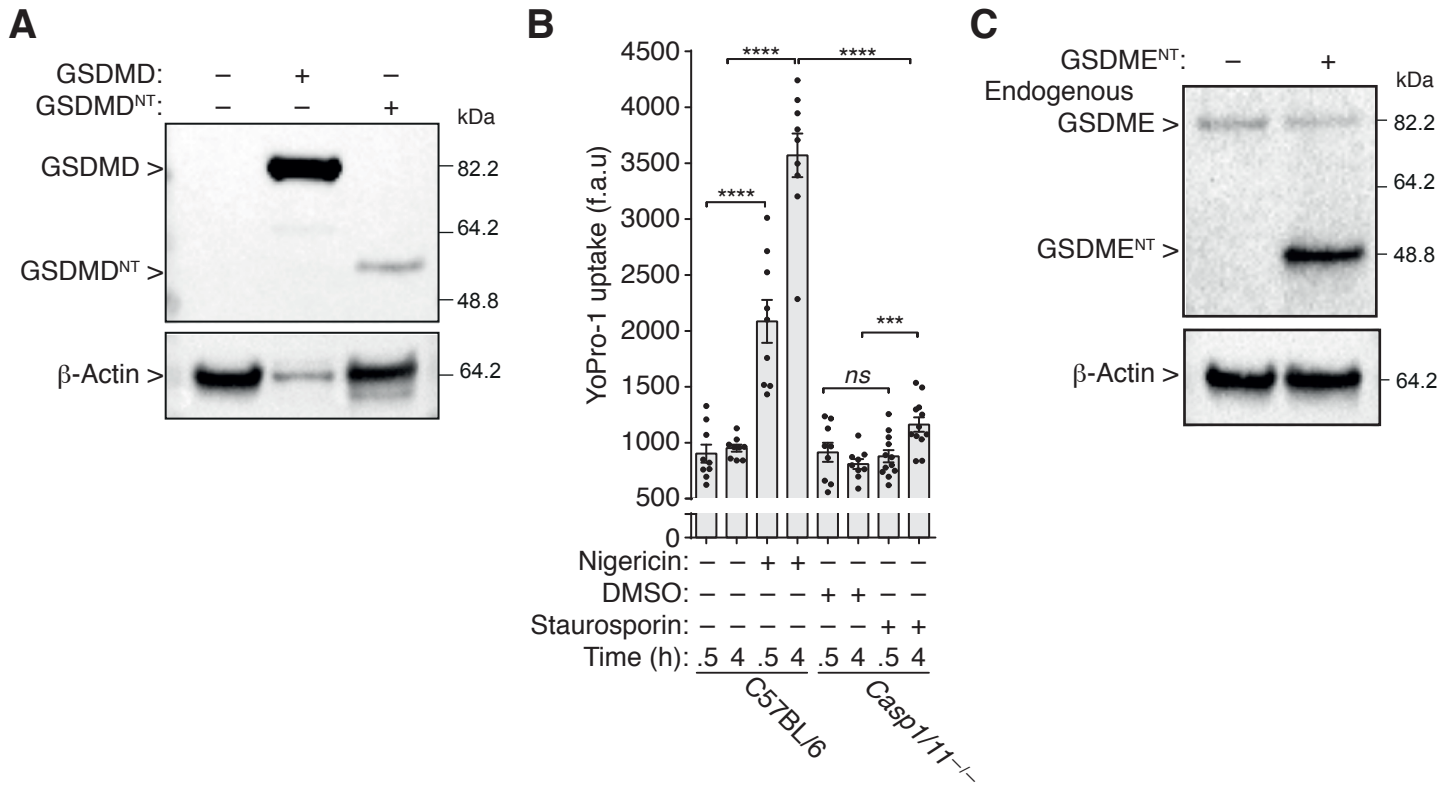

**A**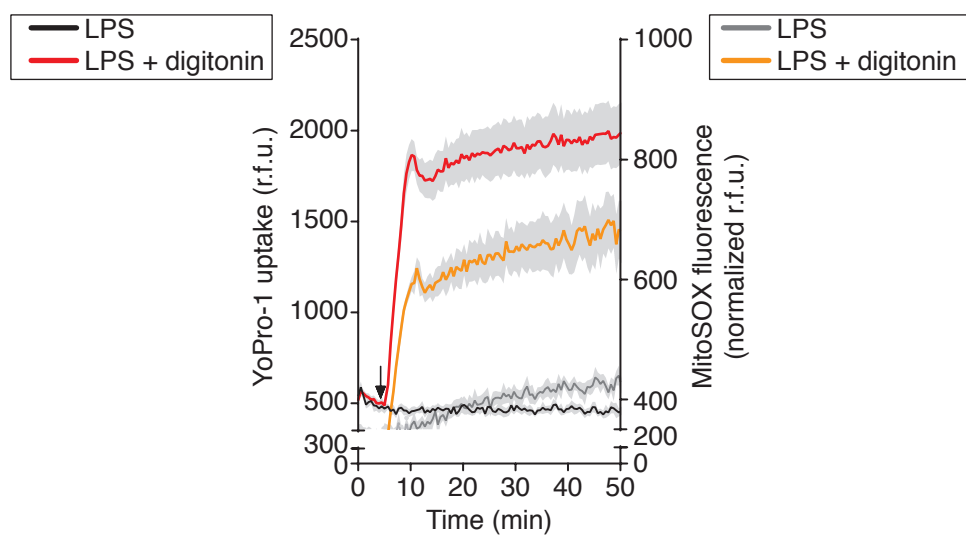**B**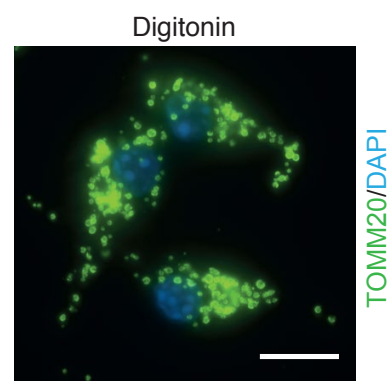

Supplementary Figure S5

Uncropped membranes Fig 1A

Membranes were probed consecutively with stripping between Bid and Gsdmd or Casp1.

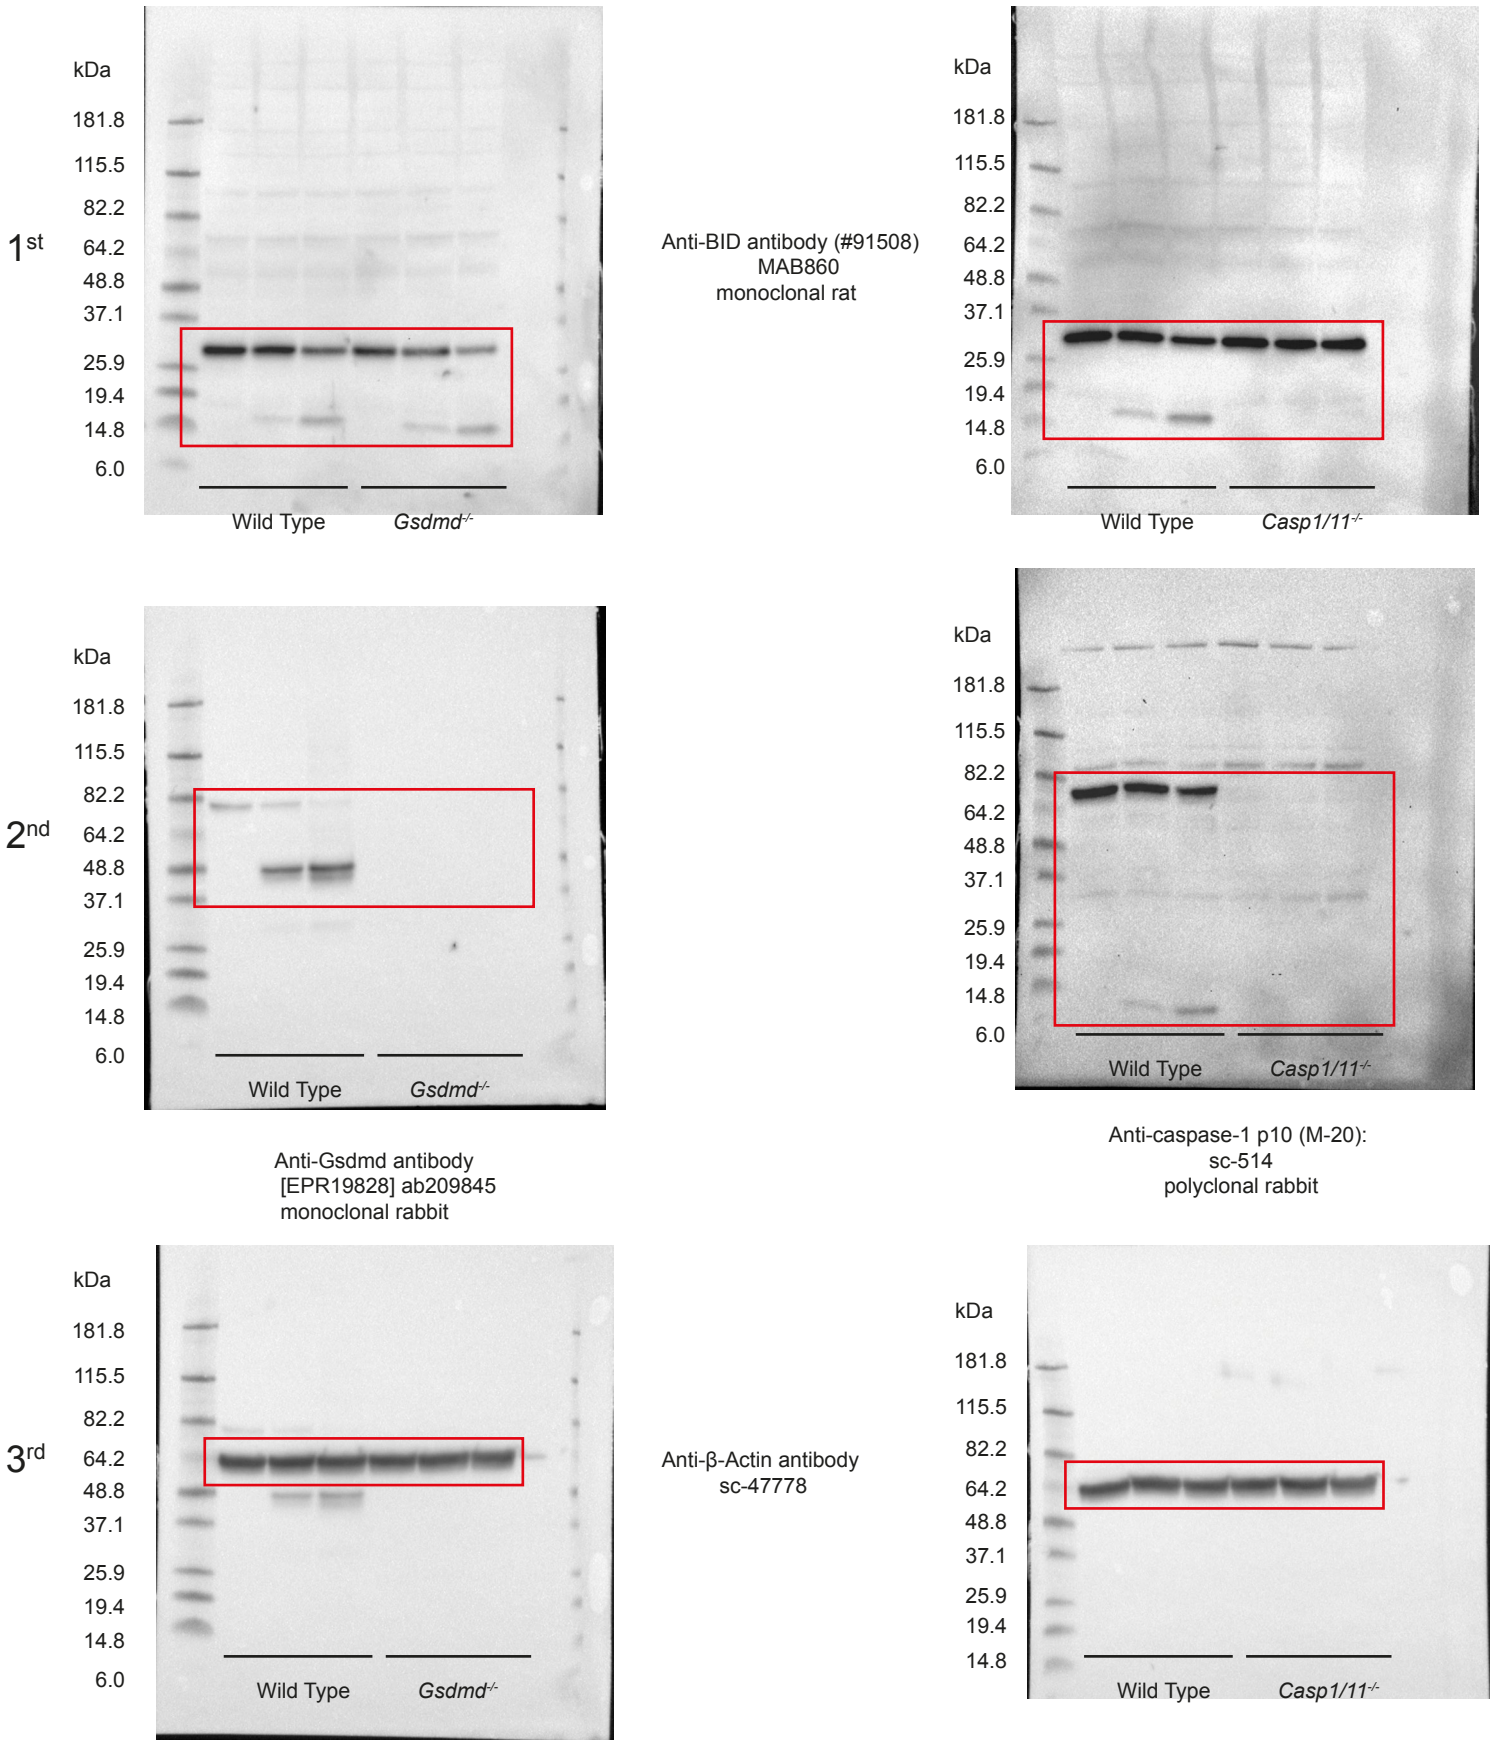



# Supplementary Figure S6

Uncropped membranes Fig 1B *Gsdmd*<sup>-/-</sup>

Membranes were probed consecutively without stripping

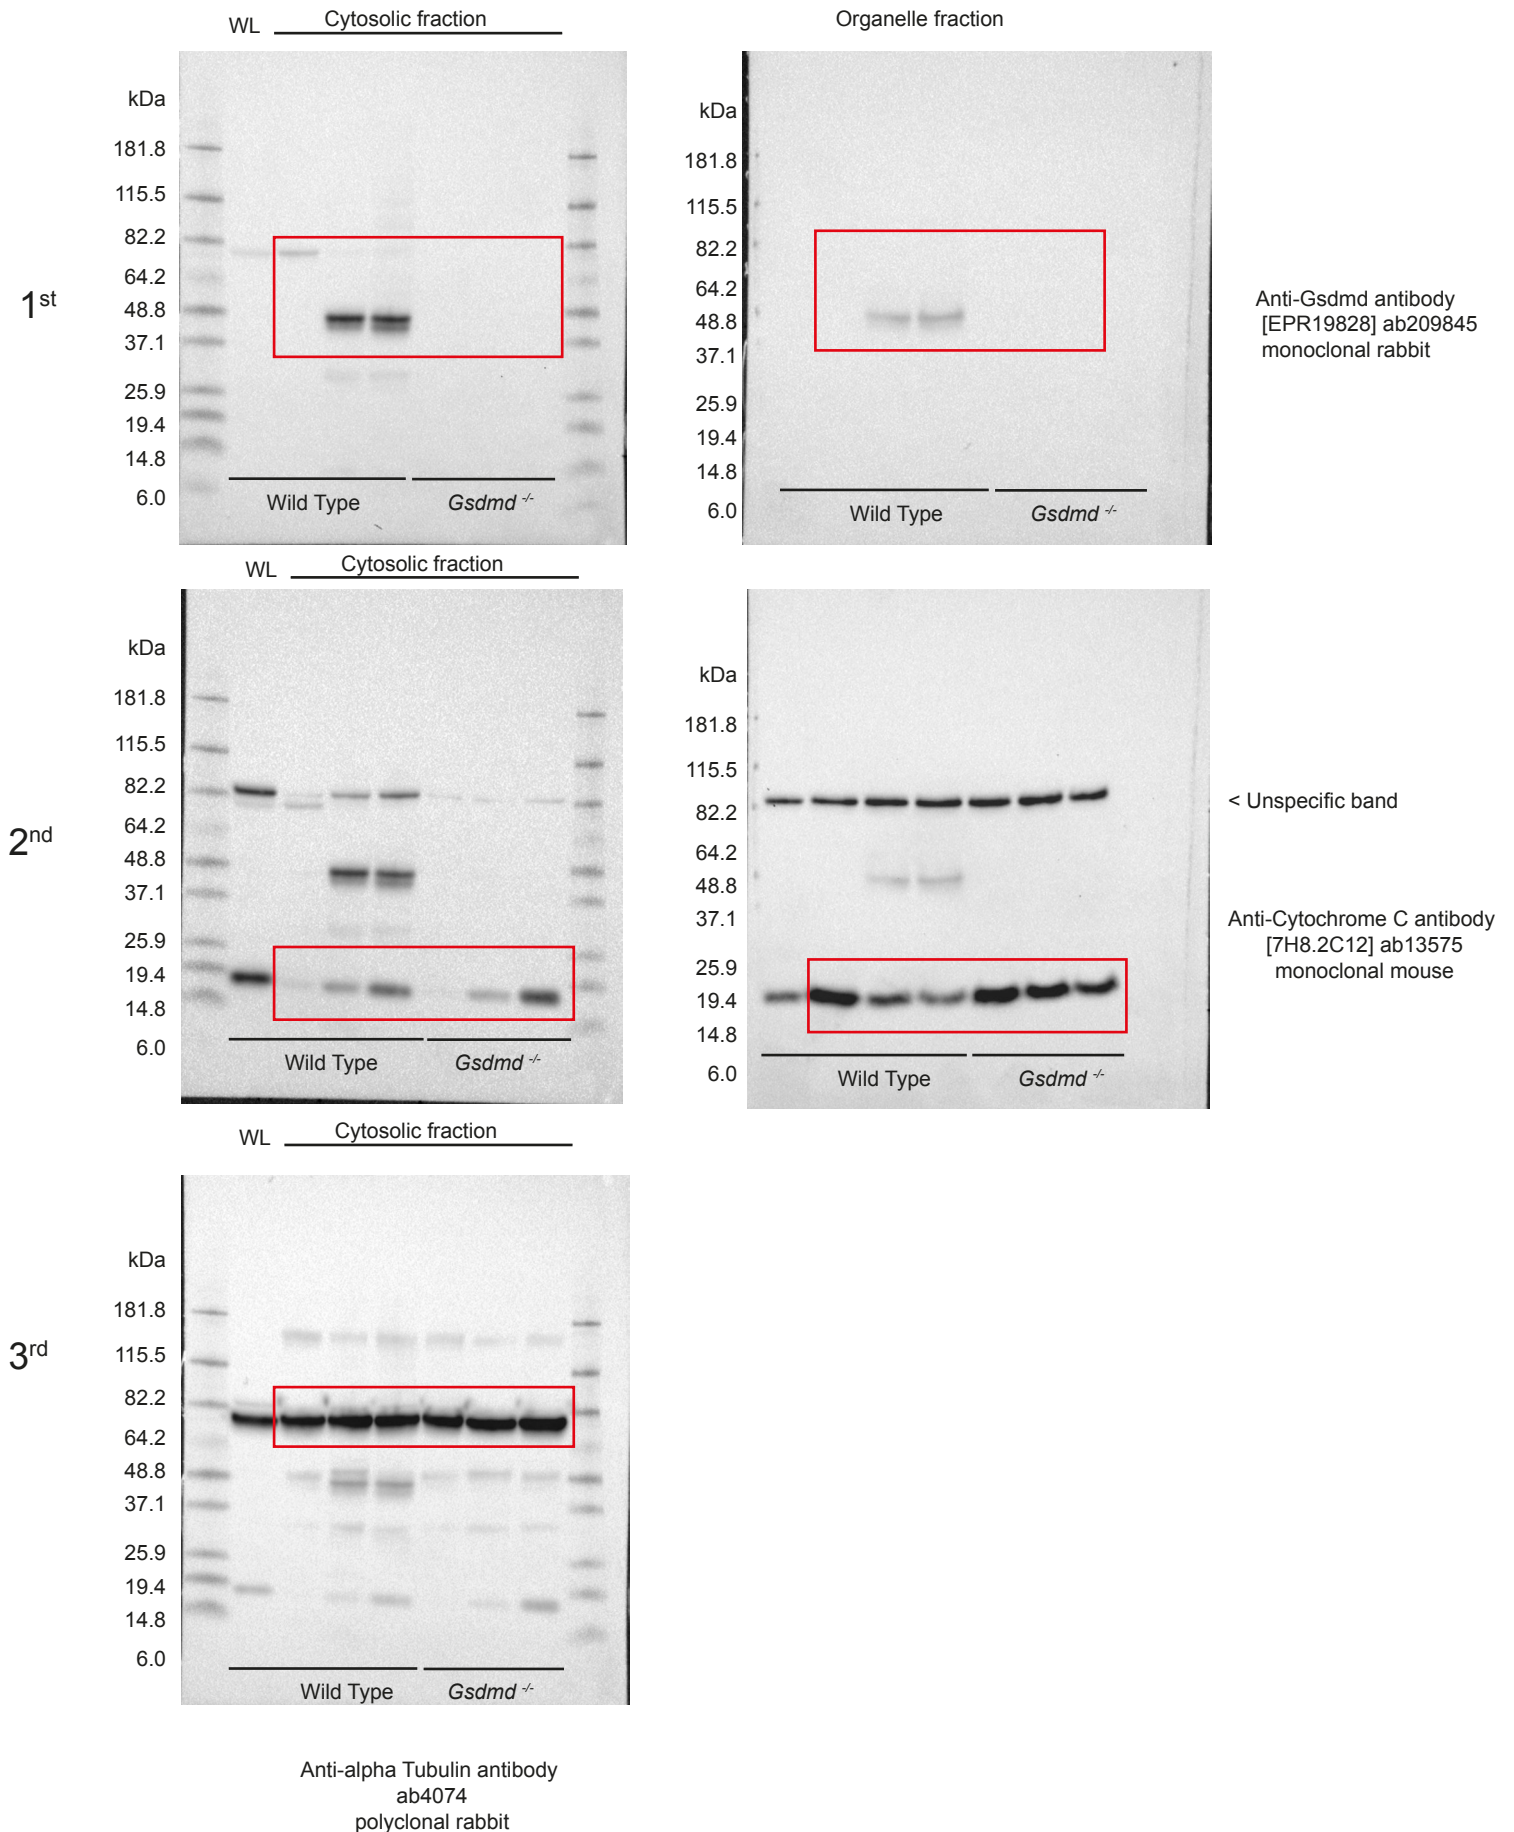

Uncropped membranes Fig 1B *Casp1/11*<sup>-/-</sup>  
Membranes were probed consecutively without stripping

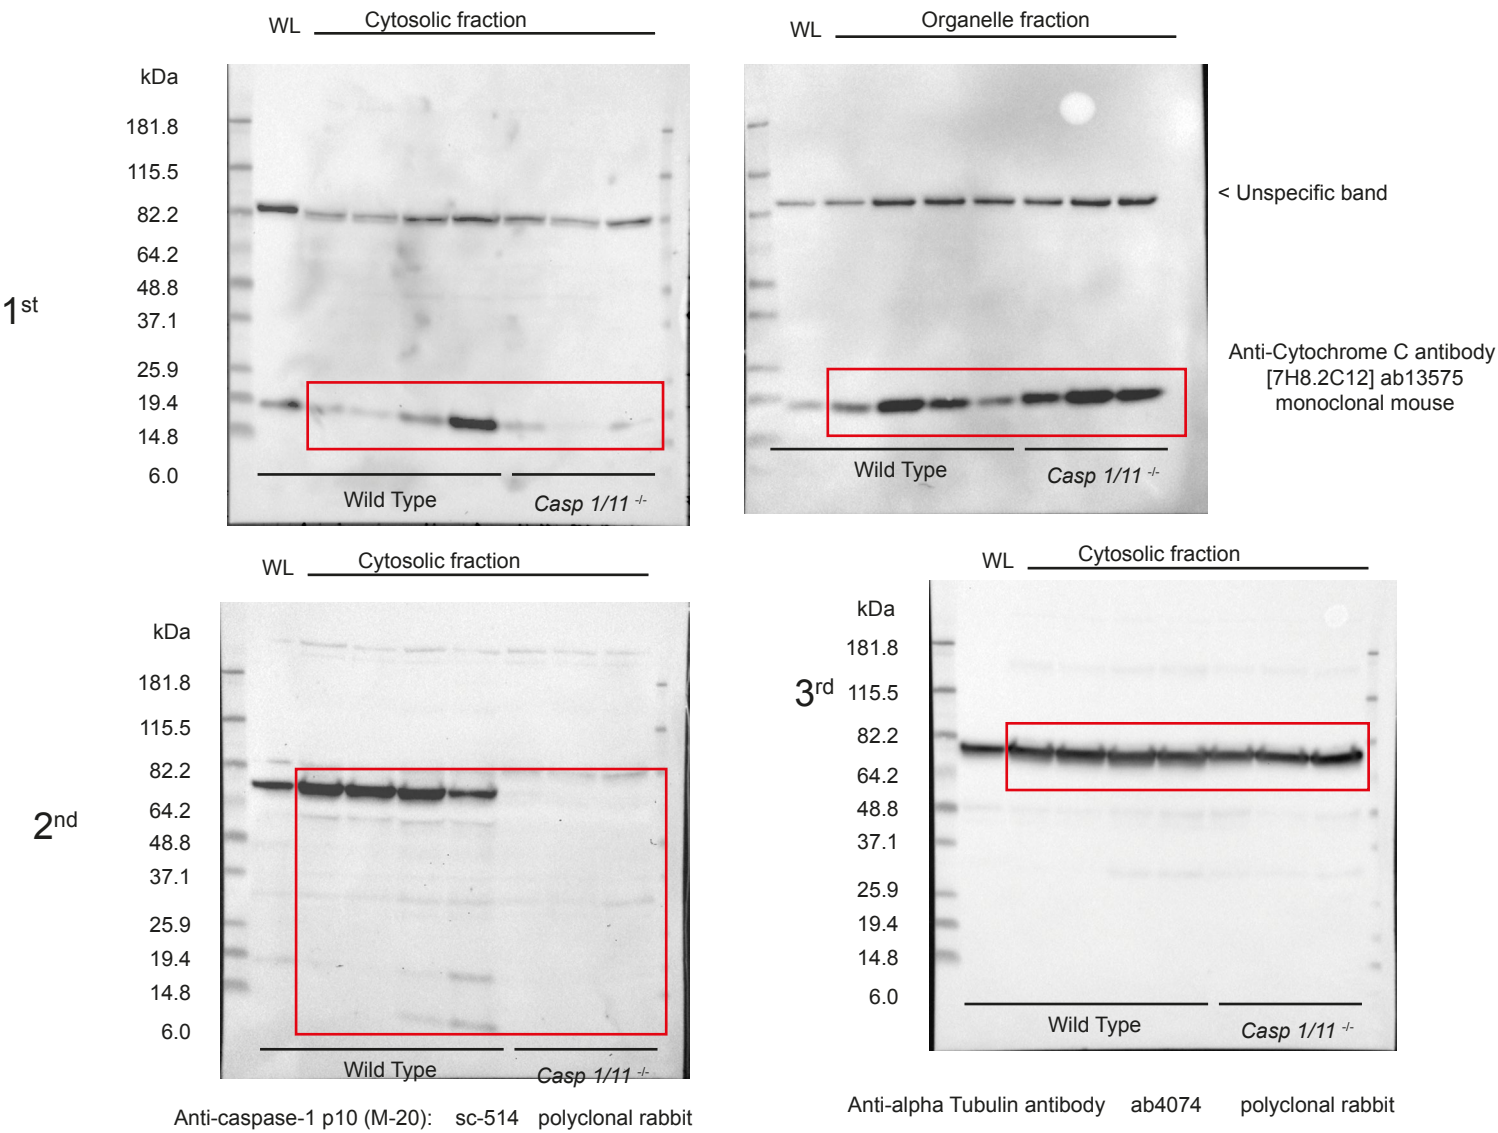

## Supplementary Figure S8

Uncropped membranes Fig 3A

Membranes were probed consecutively with stripping between Bid and Gsdmd

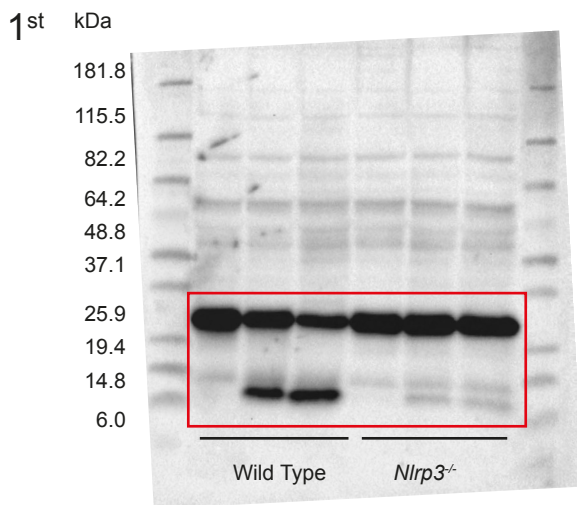

Anti-BID antibody (#91508)  
MAB860  
monoclonal rat

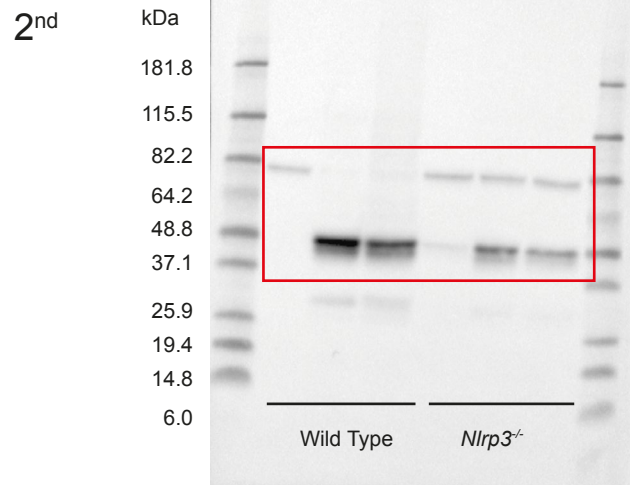

Anti-Gsdmd antibody  
[EPR19828] ab209845  
monoclonal rabbit

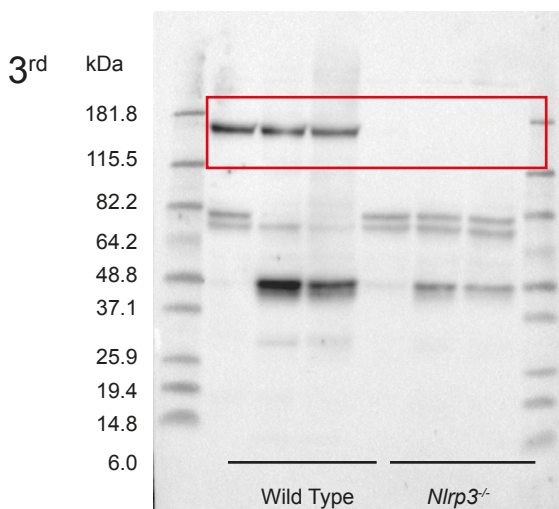

Anti-NLRP3/NALP3 antibody  
[Cryo-2] AG-20B-0014  
monoclonal mouse

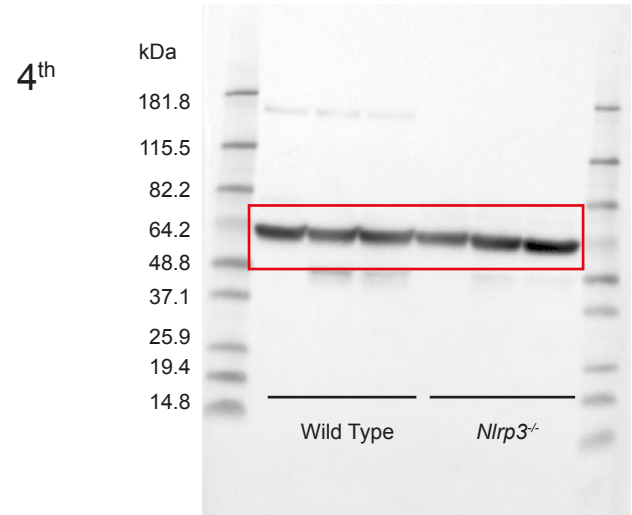

Anti- $\beta$ -Actin antibody  
sc-47778  
monoclonal mouse

## Supplementary Figure S9

Uncropped membranes Fig 4A

Membranes were probed consecutively .

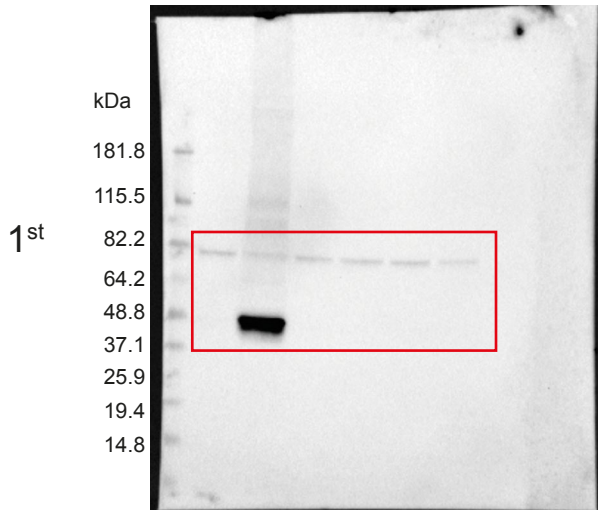

Anti-Gsdmd antibody  
[EPR19828] ab209845  
monoclonal rabbit

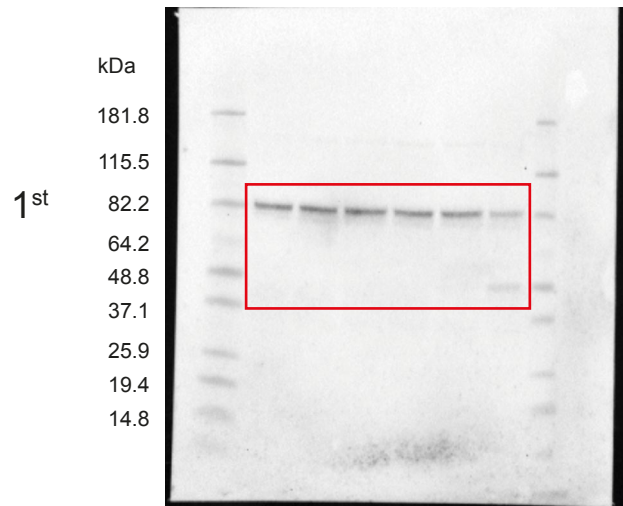

Anti-GsdmE antibody  
[EPR19859] ab215191  
monoclonal rabbit

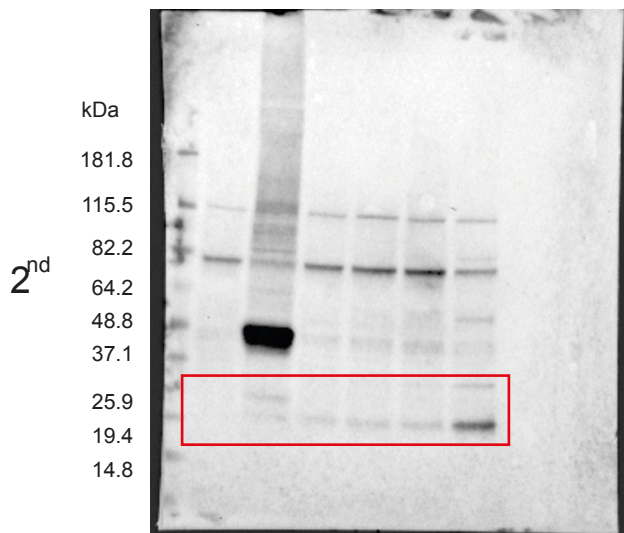

Anti-cleaved Caspase-3  
rabbit polyclonal  
(#9661, Cell signalling)

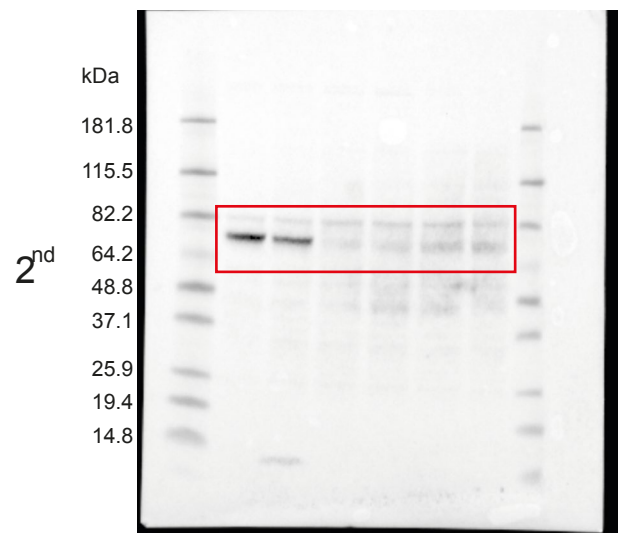

Anti-caspase-1 p10 (M-20):  
sc-514  
polyclonal rabbit

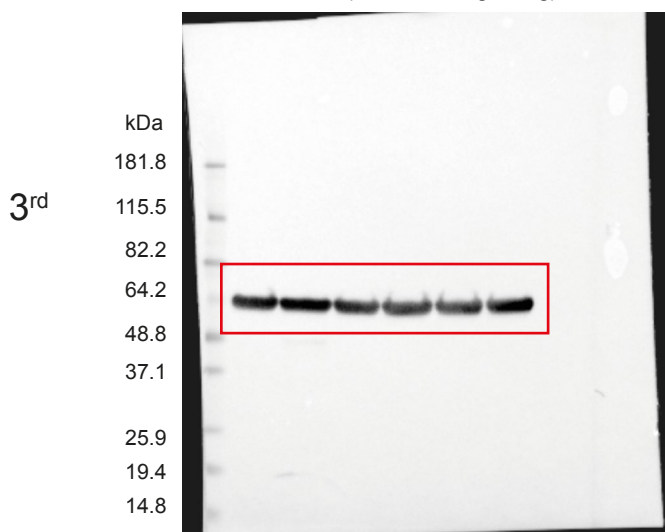

Anti-β-Actin antibody  
sc-47778

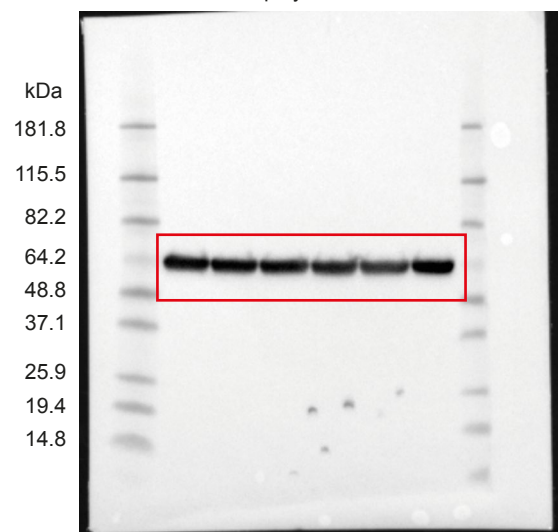

Anti-β-Actin antibody  
sc-47778



## Supplementary Figure S10

Uncropped membranes Fig 5C

Membranes were probed consecutively .

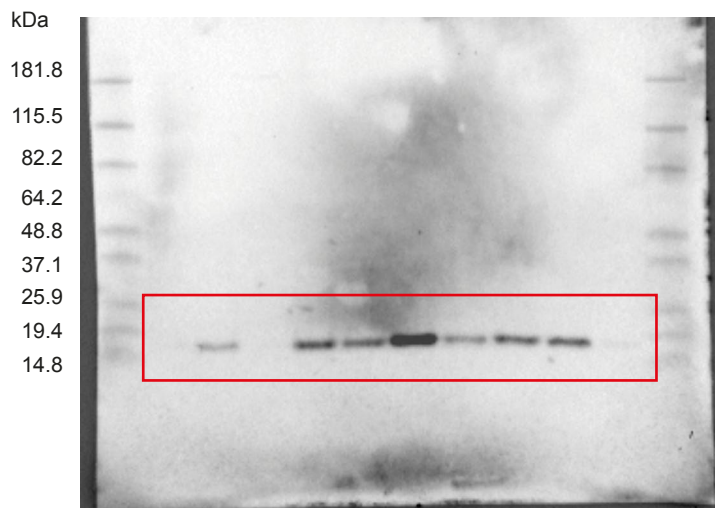

Anti-Cytochrome C antibody  
[7H8.2C12] ab13575  
monoclonal mouse

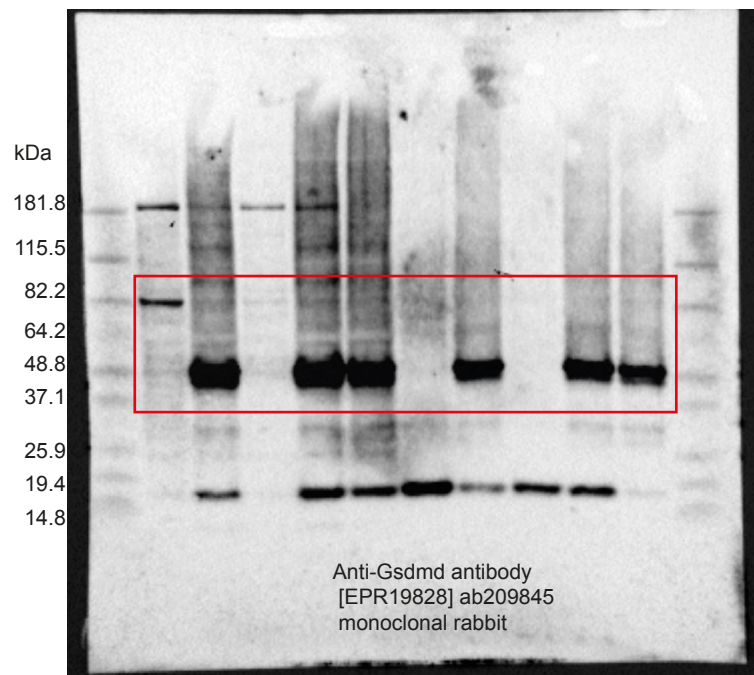

Anti-Gsdmd antibody  
[EPR19828] ab209845  
monoclonal rabbit

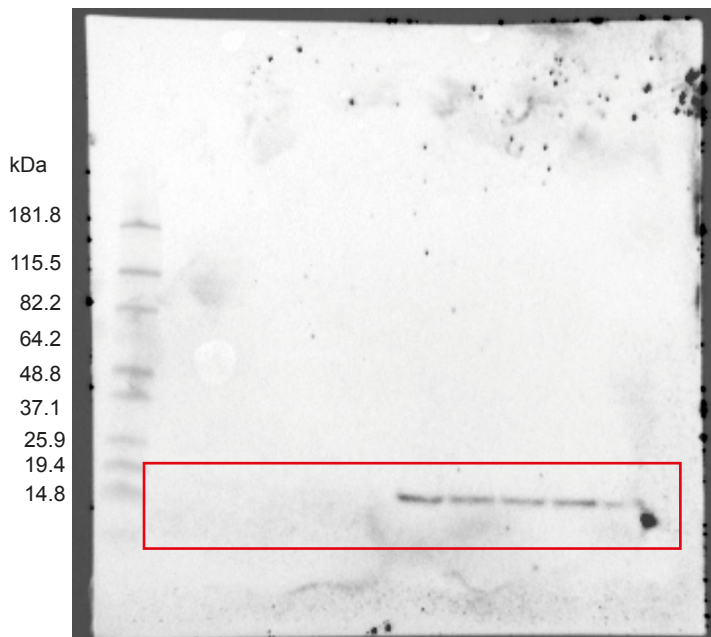

Anti-TOMM20 antibody  
EPR15581-54 ab4074  
monoclonal rabbit

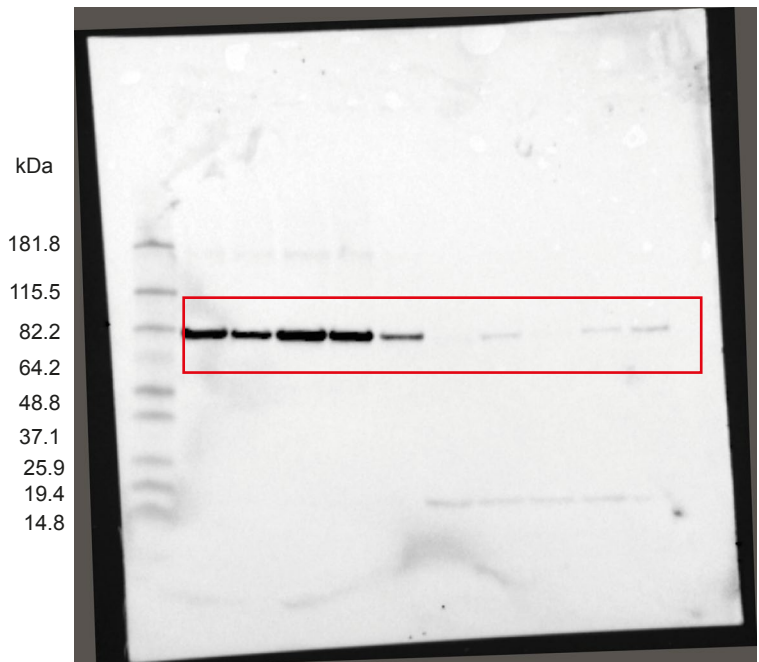

Anti-alpha Tubulin antibody  
ab4074  
polyclonal rabbit

## Supplementary Figure S11

Uncropped membranes Fig 6A

Membranes were probed consecutively without stripping .

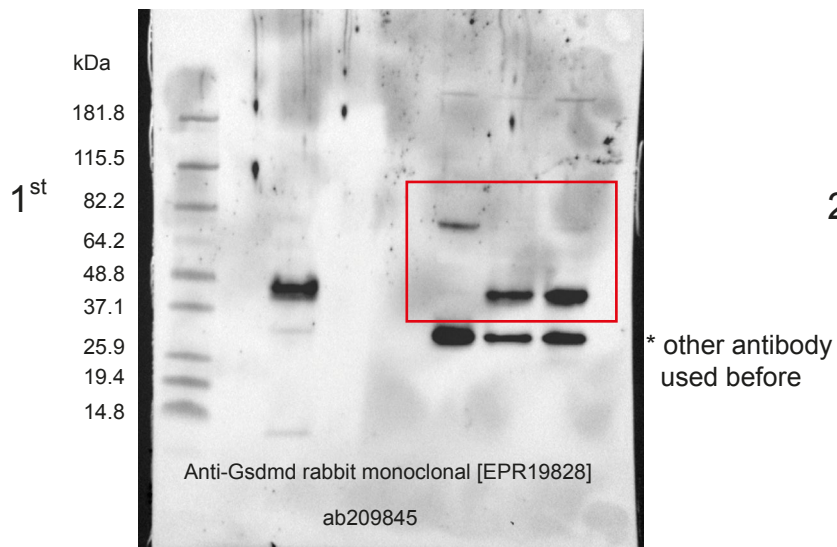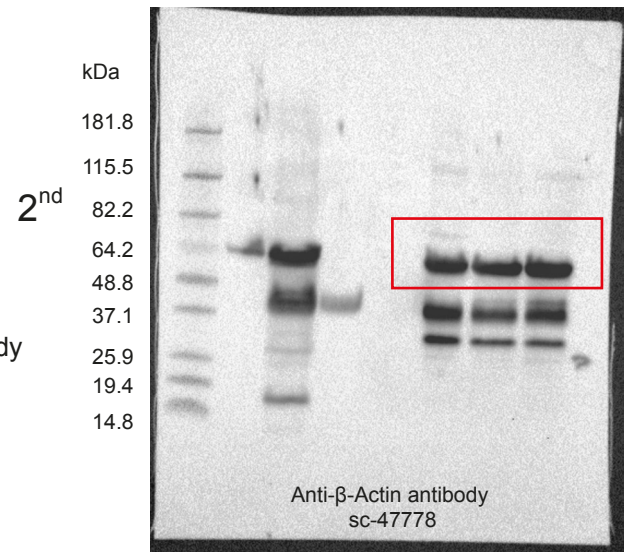

## Supplementary Figure S12

Uncropped membranes Supplementary Fig S1C

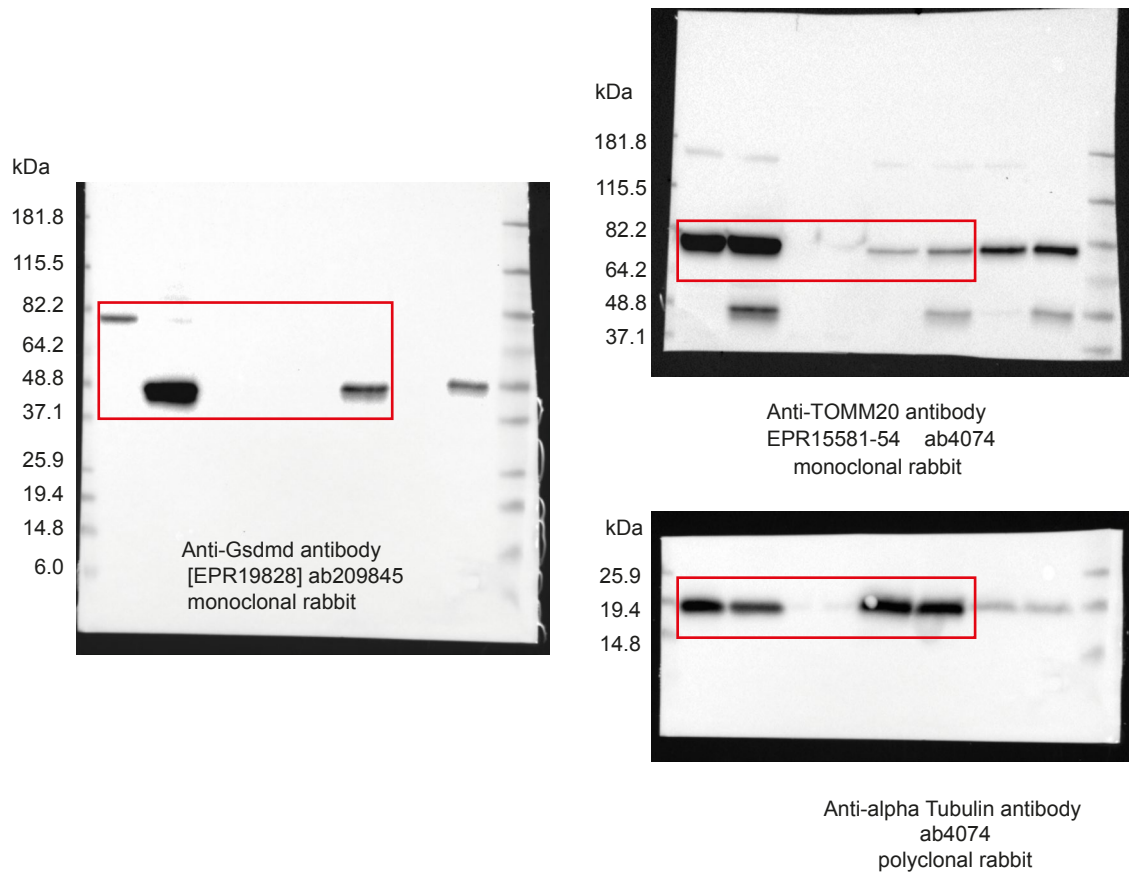

Uncropped membranes Supplementary Fig S1D

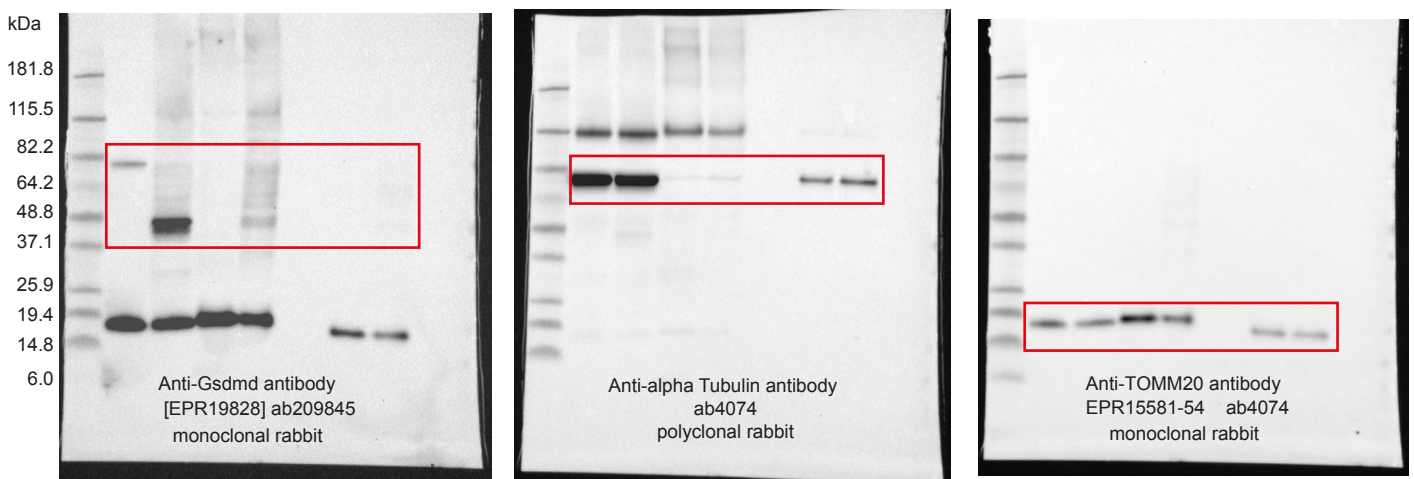

Uncropped membranes Supplementary Fig S3A  
Membranes were probed consecutively without stripping

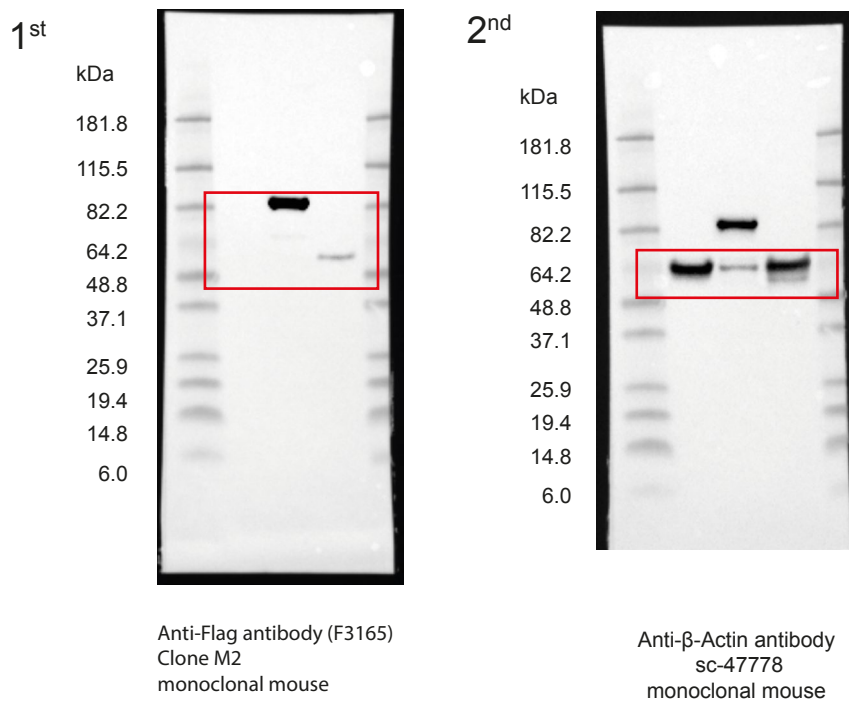

Uncropped membranes Supplementnetary Fig S3B

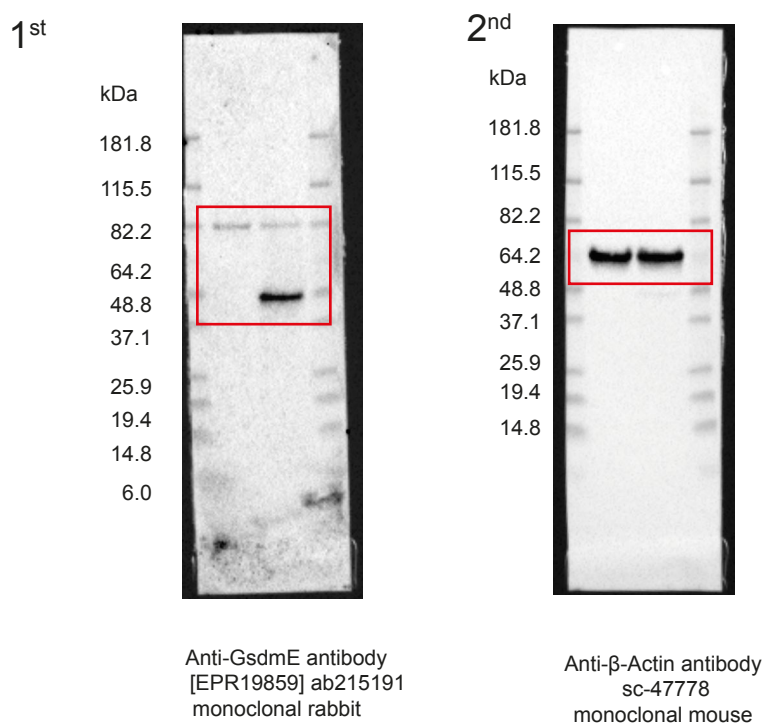

Supplement: Supplementary file 1 [file 90aa5f00edecb6f965de64f2.pdf]
